# Supplementary material for: Highly divergent patterns of genetic diversity and evolution in proviral quasispecies from HIV controllers
Source: PubMed Central journal article supplement (PMC5414336; doi:10.1186/s12977-017-0354-5), 2017-05-02

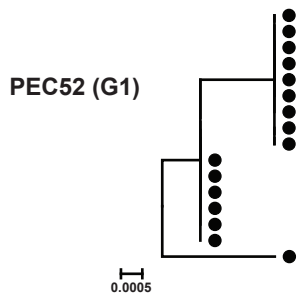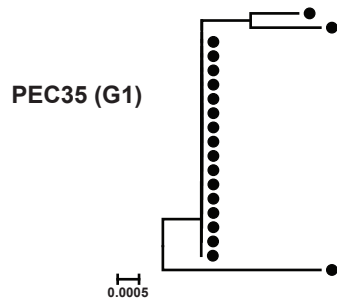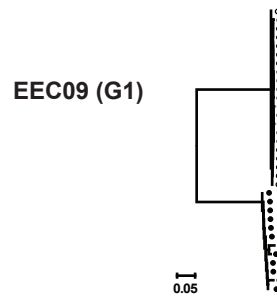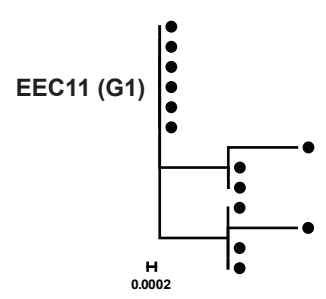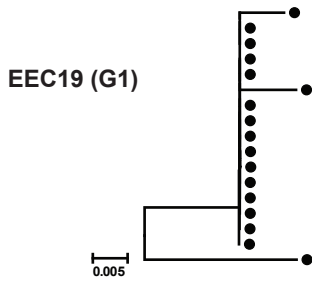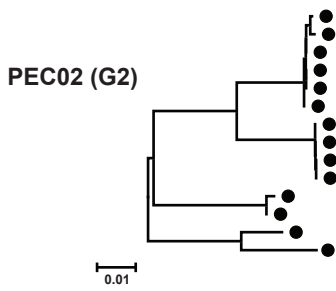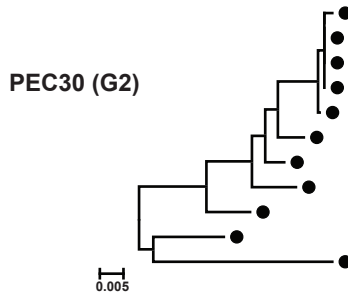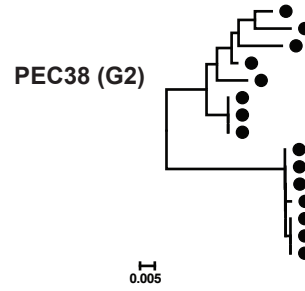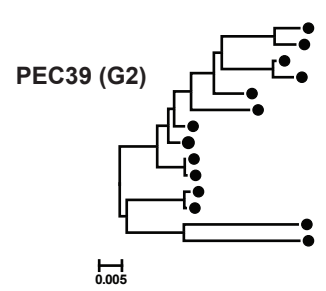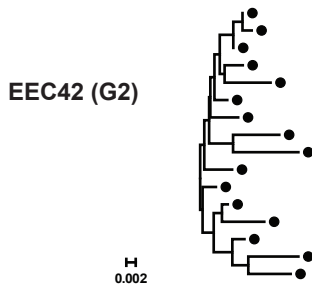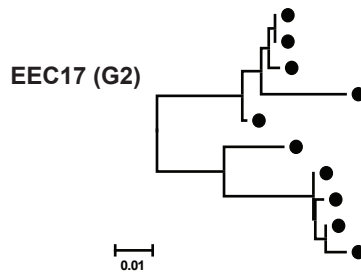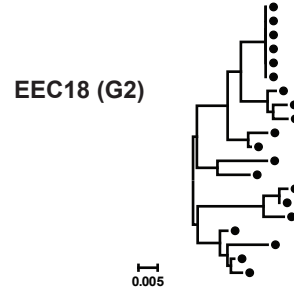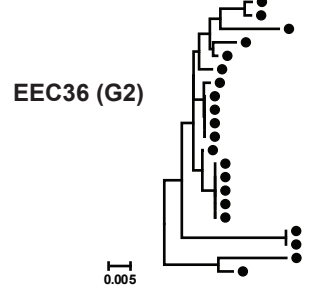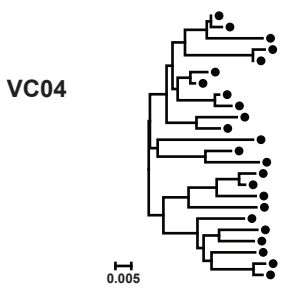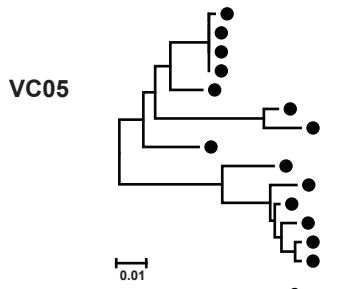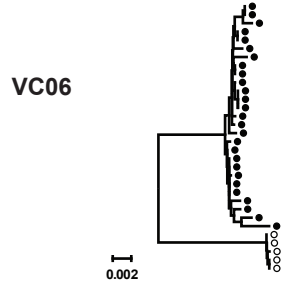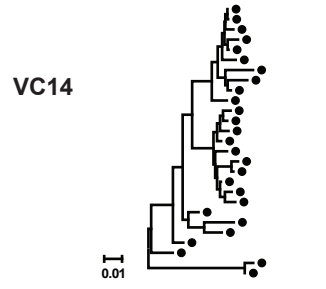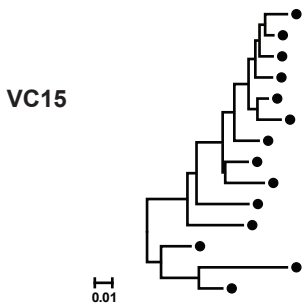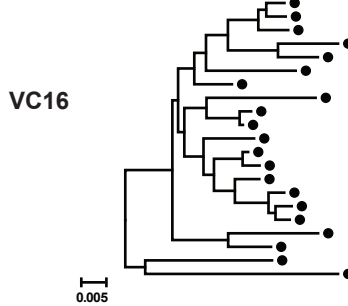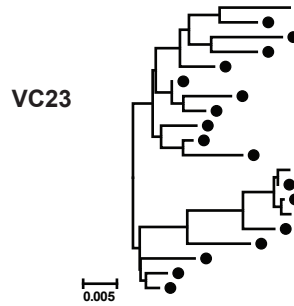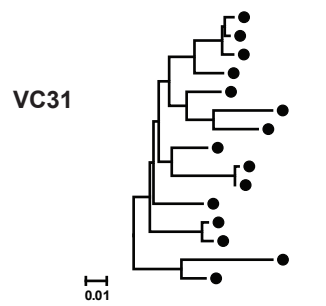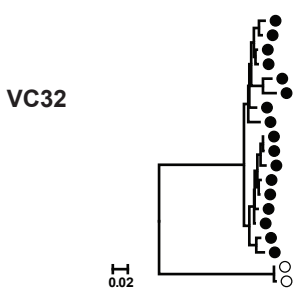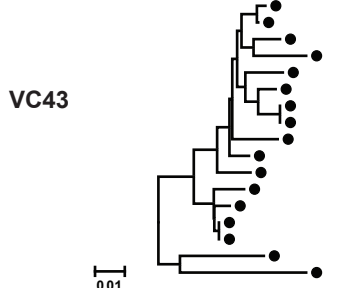

Supplement: 12977_2017_354_MOESM2_ESM.pdf [file 12977_2017_354_MOESM2_ESM.pdf]
